# Supplementary material for: Dinaphthonaphthyridines – a class of novel molecules with potent antioxidant and anticancer activity
Source: Royal Society of Chemistry journal article supplement (doi:10.1039/c2md20270k), 2012-10-31
Supplement: c2md20270k.pdf [file c2md20270k.pdf]

# DINAPHTHONAPHTHYRIDINES - A CLASS OF NOVEL MOLECULES WITH POTENT ANTIOXIDANT AND ANTICANCER ACTIVITY

K. Prabha and K. J. Rajendra Prasad\*

Department of Chemistry, Bharathiar University, Coimbatore, Tamil Nadu, India.

## Supporting information

4BQNAPH.....Prabha,

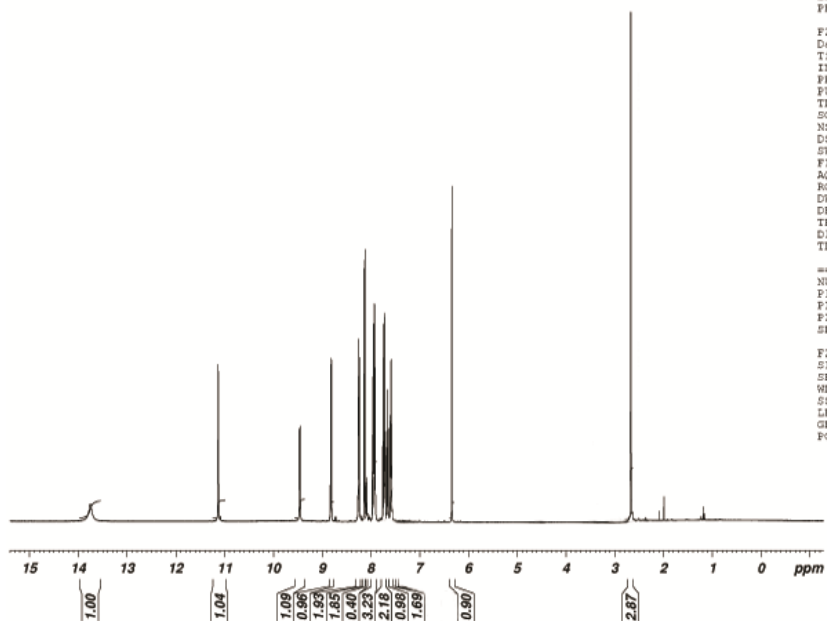

<sup>1</sup>H NMR Spectrum of compound 6

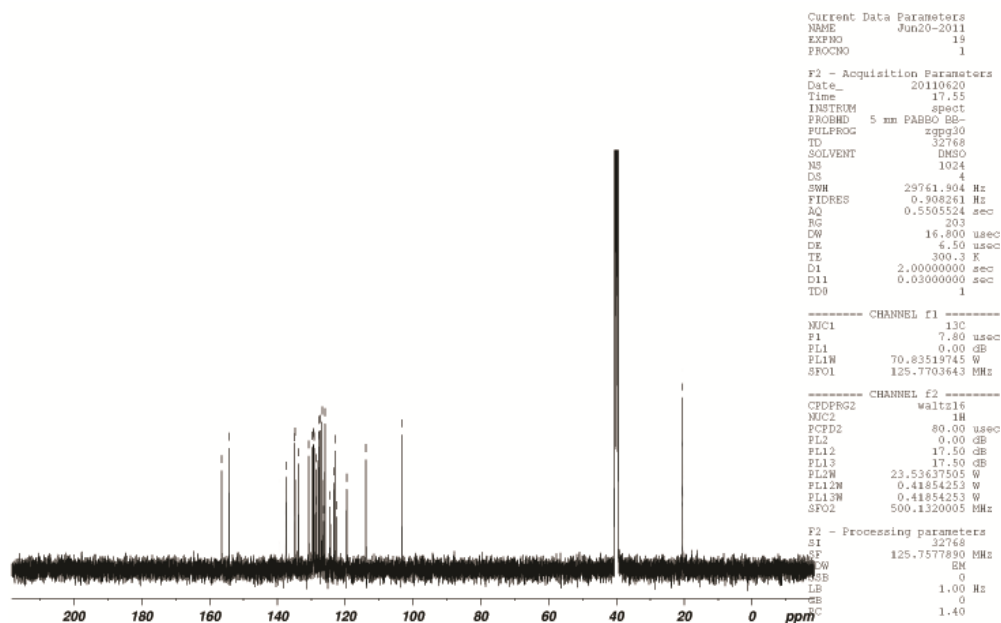

## <sup>13</sup>C NMR Spectrum of compound 6

4BQNAA.....Prabha.

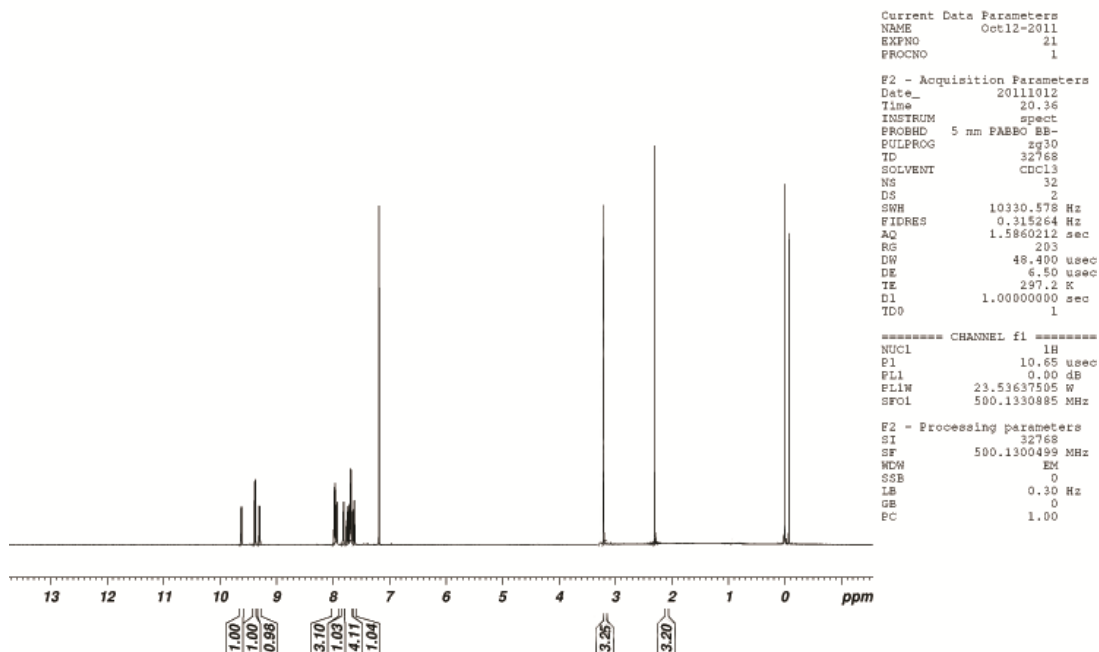

## <sup>1</sup>H NMR Spectrum of compound 7

4BQNAA.....Prabha.

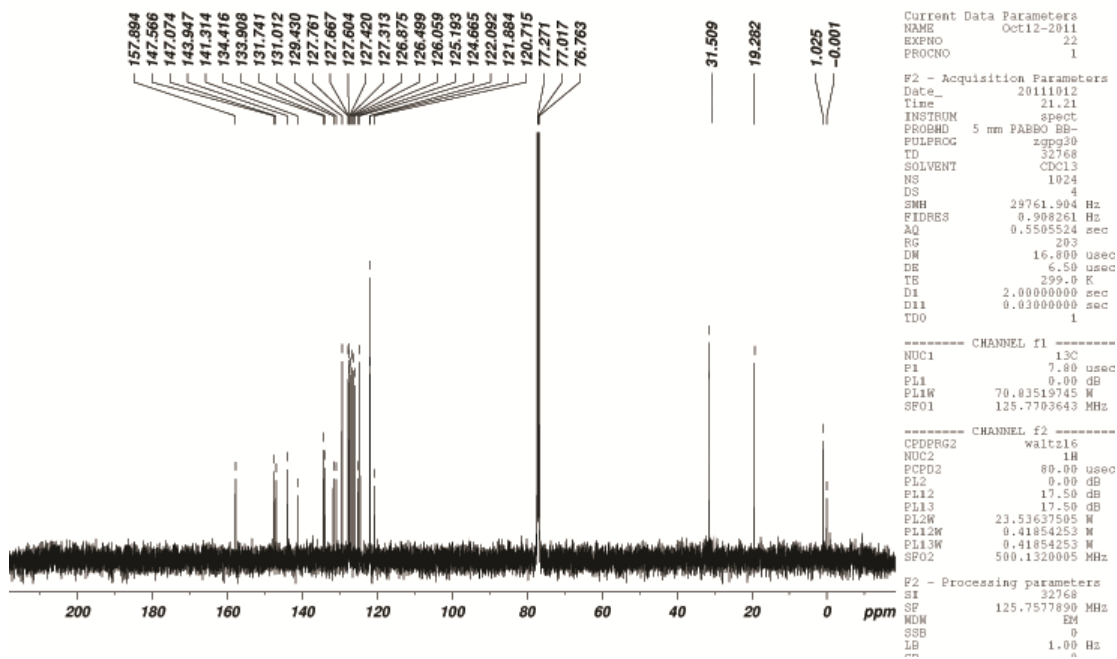

## <sup>13</sup>C NMR Spectrum of compound 7
